# Supplementary material for: Optical gearbox enabled versatile multiscale high-throughput multiphoton functional imaging
Source: Springer Nature journal article supplement (doi:10.1038/s41467-022-34472-6), 2022-11-02
Supplement: MOESM2 [file 41467_2022_34472_MOESM2_ESM.pdf]

## **Description of Additional Supplementary Files**

**Supplementary Movie 1 | Polygon-based optical gearbox system with dual path configuration.**

The optical configuration and scanning sequence of the dual-path gearbox system.

**Supplementary Movie 2 | In vivo 2D high-speed calcium recording with the gearbox system.**

**Supplementary Movie 3 | 3D volumetric recording with the gearbox system.**

**Supplementary Movie 4 | High-speed blood flow imaging with the gearbox system.**
